# Supplementary material for: Genomics on a warming sea: structure and adaptation of the Mediterranean loggerhead (Caretta caretta) nesting populations
Source: Research Square preprint supplement (doi:10.21203/rs.3.rs-8164483/v1), 2025-12-02
Supplement: Supplementary file 2 [file 646116f75ea91c10464b0ecc.docx]

NOTE: The tables are found in the Supplementary excel for easy access.

**Table S1.** **Sampling details and genetic diversity indexes.** We include the population name and acronym used in the manuscript, the sample size, the geographic coordinates (latitude and longitude) and the following diversity indexes: observed heterozygosity (*Ho*), expected heterozygosity (*He*), inbreeding coefficient (*FIS*) and allelic richness (*Ar*). The *FIS* was significantly different from zero in all populations.

**Table S2.** **Estimation of population size.** Effective population size (*Ne*) obtained using our genomic data. Mean annual number of nests (Nests) obtained from the literature from two different periods: prior 1999 and after 2000. Nest counts were used to calculate the number of adults (Na) for the two periods (see details in the Methods section).

**Table S3.** **Phenotypic and environmental variables obtained for each population**. As reproductive variable we provide the mean clutch size as the mean number of eggs per nest. The seven environmental variables include salinity at 1m (Sal_1m), 50m (Sal_50m) and 100m (Sal_100m) depth, and temperature as mean (Mean_T), minimum (Min_T), maximum (Max_T) and range (Range_T). As hatchling dispersal potential for each nesting area, we present the percentage of particles from each nesting region reaching each one of the considered foraging areas. We finally include information on the stable isotopes signature (δ15N and δ13C) of hatchlings found in the sampling locations that reflect the food intake of nesting females prior to nest.

**Table S4.** **Overall genetic differentiation among Mediterranean nesting populations**. Pairwise population genetic differentiation using the whole dataset (5,998 SNP loci). The FST values are given above the diagonal while the corresponding p-values are found below the diagonal. Bold values indicate non-significant p-values after FDR correction and their corresponding FST values.

**Table S5.** **Neutral and adaptive genetic differentiation among Mediterranean nesting populations.** Pairwise FST values among all populations using the set of outlier loci (16 loci shared by pcadapt and bayescan, above the diagonal) and neutral loci (5,844 loci, excluding all loci identified by any of the two programs, below the diagonal). Bold values indicate non-significant FST values after FDR correction.

**Table S6.** **Genomic location of total and candidate SNP loci.** Location of all the SNP loci used in the study (ALL list of SNPS) and the SNPS of the different subsets of candidate loci resulting from the different analyses. The SNPs of the different lists were first classified as being within a gene or not. Then, all the SNPs in genes were classified according to being in protein coding (ProtCod) or non-protein coding (Non-ProtCod) genes. Finally, all the SNPs located in all gene types or only protein coding genes were classified as being in exonic or intronic regions. Note that the ‘TOTAL adaptive’ list of SNPs is not the sum of the different lists of candidate loci as some candidate SNPs appeared in more than one analysis.

**Table S7.** **Protein coding genes candidate for adaptation.** Characterization of the 328 protein coding genes identified in each of the association and outliers SNPs analyses (see Table S6). We include the analysis in which the candidate gene was found (RDA_CLUTCH: clutch size and geographic location, RDA_DISP: short-term dispersal data, RDA_SIA: stable isotopes, RDA_ENV: temperature and salinity, Bayescan and pcadapt), its location within the protein, the name of the gene and its description.

**Table S8.** **Enriched GO terms.** Detail of the GO terms found in the enrichment analysis, including their category (Biological Process (BP) or Molecular Funcion (MF)), the analysis where the significant GO terms were found (RDA_CLUTCH: clutch size and geographic location, RDA_DISP: short-term dispersal data, RDA_SIA: stable isotopes, Bayescan and pcadapt), the description of the GO term and the candidate proteins associated.
