# Supplementary material for: Genomics on a warming sea: structure and adaptation of the Mediterranean loggerhead (Caretta caretta) nesting populations
Source: Research Square preprint supplement (doi:10.21203/rs.3.rs-8164483/v1), 2025-12-02
Supplement: Supplementary file 3 [file 8d95ddd9b654c0cf1315dfe8.xlsx]

## Sheet: Table S1 Genetic Diversity
Population	Acronym	n	Years	Latitude	Longitude	Ho	He	Fis	Ar
Zakynthos	ZAK	16	2019	37.7217	20.8924	0.200562	0.196845	-0.0202406	1.19723
Kyparissia	KYP	25	2012	37.2576	21.6582	0.186194	0.193489	0.0377064	1.19334
Rethymno	RET	23	2017	35.3784	24.4682	0.191476	0.195228	0.0192221	1.19514
Messaras	MES	18	2018-2019	34.9245	24.6573	0.195219	0.20053	0.0264861	1.20038
Dalyan	DAL	24	2004-2008	36.7828	28.5784	0.192849	0.200213	0.0367821	1.20006
Belek	BEL	24	2007-2008	36.82	31.0576	0.19142	0.198506	0.0356919	1.19835
Akamas	AKA	25	2005-2006	35.0409	32.2583	0.190872	0.200049	0.0458741	1.19985
Alagadi	ALA	25	2016-2017	35.2016	33.2928	0.193076	0.199213	0.0308083	1.19908
Lebanon	LEB	19	2004-2006	33.2367	35.0581	0.192912	0.199304	0.0320737	1.19912
Israel	ISR	21	2018	32.353	34.6434	0.193714	0.201051	0.0364916	1.20086
Libya	LIB	23	2005-2006	31.3057	16.5992	0.193751	0.201605	0.0389586	1.20141

## Sheet: Table S2 Ne_Na
Population	Acronym	Ne	Nests<1999	Nests >2000	Na < 1999	Na > 2000
Zakynthos	ZAK	2530.2	1301.3	1084.4	3938.14	3281.74
Kyparissia	KYP	3736.48	580.7	987	1757.38	2986.97
Rethymno	RET	127.42	387.3	275	1172.09	832.237
Messara	MES	242.158	53.5	46.9	161.908	141.934
Dalyan	DAL	2607.95	165	269	499.342	814.079
Belek	BEL	1628.13	129.7	638	392.513	1930.79
Akamas	AKA	606.862	179.6	337.4	543.5	1021.1
Alagadi	ALA	754.754	65.7	54.1	198.829	163.724
Lebanon	LEB	115.407	NA	55	NA	166.447
Israel	ISR	110.973	NA	93	NA	281.447
Libya	LIB	345.56	NA	220	NA	665.789

## Sheet: Table S3 Phen-Env Variables
		Reproductive variables	Environmental variables							Hatchling dispersal						Stable Isotopes
Population	Acronym	Mean clutch size	Sal_1m	Sal_50m	Sal_100m	Mean_T	Min_T	Max_T	Range_T	Nesting region	Adriatic	Ionian	South-Central	Aegean	Levantine	δ13C	δ15N
Zakynthos	ZAK	111.8	38.772	38.741	38.831	16.8603	6.15	28.35	22.2	Western Greece	14.5	70.2	9.3	0.1	5.9	-16.7	11.4
Kyparissia	KYP	116	38.862	38.785	38.824	20.065	12.3692	29.0833	16.7142	Western Greece	14.5	70.2	9.3	0.1	5.9	-16.3	10.4
Rethymno	RET	102	39.261	39.105	39.048	19.9385	12.4067	28.6789	16.2722	Eastern Greece	1.3	25.8	30.7	12.7	29.6	-16.1	9.6
Messara	MES	108.1	39.13	39.006	38.98	20.0028	12.8543	27.7514	14.8971	Eastern Greece	1.3	25.8	30.7	12.7	29.6	-16.1	9.6
Dalyan	DAL	77.75	39.222	39.15	39.118	20.9153	13.6815	29.3623	15.6808	Turkey	0.1	8.7	14.1	21.3	55.9	-15.1	10.1
Belek	BEL	78	39.313	39.167	39.117	21.8908	13.7054	31.6077	17.9023	Turkey	0.1	8.7	14.1	21.3	55.9	-15.1	10.1
Akamas	AKA	79	39.257	39.034	39.014	21.3736	13.026	30.48	17.454	Cyprus	0	1.9	8.5	3.8	85.8	-16.4	9.9
Alagadi	ALA	70	39.321	39.117	39.088	21.6024	13.872	30.821	16.949	Cyprus	0	1.9	8.5	3.8	85.8	-15.4	9.7
Lebanon	LEB	91.5	39.239	39.114	39.07	22.2778	14.3105	30.5295	16.219	Syria (green turtle)	0	2.4	7.6	15.6	74.4	-16.2	9.9
Israel	ISR	78.4	39.19	39.078	39.039	21.4015	10.64	31.48	20.84	Syria (green turtle)	0	2.4	7.6	15.6	74.4	-17	9.3
Libya	LIB	91.1	38.311	38.207	38.111	21.0304	13.3061	29.7444	16.4383	Libya	0	0.2	99.6	0	0.2	-16.5	9.8

## Sheet: Table S4 Pairwise Fst
	ZAK	KYP	RET	MES	DAL	BEL	AKA	ALA	LEB	ISR	LIB
ZAK	NA	0.0027	0.0053	0.006	0.0156	0.0188	0.0171	0.0166	0.0207	0.0202	0.0203
KYP	0.245	NA	0.0028	0.0062	0.014	0.0175	0.0158	0.0144	0.0189	0.0199	0.0186
RET	0.002	0.005	NA	0.0035	0.009	0.0105	0.0103	0.0087	0.012	0.0138	0.0115
MES	0.001	0.001	0.002	NA	0.0044	0.0069	0.004	0.0043	0.0086	0.0069	0.0082
DAL	0.001	0.001	0.001	0.001	NA	0.0005	0.003	0.0021	0.0064	0.0053	0.0083
BEL	0.001	0.001	0.001	0.001	0.384	NA	0.0032	0.0021	0.0062	0.0056	0.0071
AKA	0.001	0.001	0.001	0.001	0.1	0.007	NA	0.0008	0.004	0.0043	0.0068
ALA	0.001	0.001	0.001	0.001	0.029	0.058	0.04	NA	0.0034	0.0033	0.0049
LEB	0.001	0.001	0.001	0.001	0.001	0.001	0.001	0.001	NA	0.0083	0.01
ISR	0.001	0.001	0.001	0.001	0.003	0.001	0.002	0.002	0.001	NA	0.0084
LIB	0.001	0.001	0.001	0.001	0.001	0.001	0.001	0.001	0.001	0.001	NA

## Sheet: Table S5 Fst Outliers vs neutra
	ZAK	KYP	RET	MES	DAL	BEL	AKA	ALA	LEB	ISR	LIB
ZAK	NA	0.0035	0.0289	0.0242	0.187	0.1699	0.1472	0.1945	0.1782	0.1696	0.2109
KYP	0.0015	NA	0.0024	0.0053	0.1681	0.1471	0.1469	0.1713	0.0166	0.1734	0.0161
RET	0.0041	-0.0018	NA	0.0256	0.127	0.0913	0.1037	0.1174	0.1124	0.127	0.1237
MES	0.0049	0.0376	0.0029	NA	0.0758	0.0573	0.0334	0.0721	0.0615	0.0534	0.0823
DAL	0.0123	0.0108	0.0067	0.0026	NA	0.0358	0.0125	0.0048	0.0046	0.0035	0.0062
BEL	0.0152	0.0141	0.0082	0.0048	-0.0001	NA	0.0163	0.0143	0.0044	0.0036	0.0052
AKA	0.0145	0.0137	0.009	0.0032	0.0014	0.0015	NA	0.0043	0.0037	0.0037	0.0061
ALA	0.0137	0.012	0.0077	0.003	0.0009	0.0008	0.0002	NA	0.0029	0.0024	0.0042
LEB	0.0178	0.1558	0.0107	0.0075	0.0162	0.0022	0.0086	0.0071	NA	0.0246	0.009
ISR	0.0174	0.0175	0.0125	0.0058	0.0081	0.0207	-0.0098	0.0191	0.0067	NA	0.008
LIB	0.017	0.1847	0.0105	0.0069	0.0476	0.018	0.0064	0.0173	0.035	0.027	NA

## Sheet: Table S6 SNP loci classif
		Distribution of SNPs		Percentage of SNPs		SNPs in genes		SNPs in genes		SNPs in protein coding genes
List of SNPs	SNPs	not Genes	genes	in all gene types	in protein coding genes	Non-ProtCod	ProtCod	% exonic	% intronic	% exonic	% intronic
ALL	5998	2544	3454	57.59%	54.98%	156 (4.5%)	3298 (95.5%)	7.04%	92.96%	6.76%	93.24%
bayescan	73	32	41	56.16%	53.42%	2 (4.9%)	39 (95.1%)	7.32%	92.68%	7.69%	92.31%
pcadapt	97	37	60	61.86%	58.76%	3 (5%)	57 (95%)	6.67%	93.33%	7.02%	92.98%
RDA_CLUTCH	237	111	126	53.16%	52.32%	2 (1.6%)	124 (98.4%)	6.35%	93.65%	5.65%	94.35%
RDA_DISP	247	110	137	55.47%	53.85%	4 (2.9%)	133 (97.1%)	6.57%	93.43%	6.77%	93.23%
RDA_ENV	230	86	144	62.61%	60.87%	4 (2.8%)	140 (97.2%)	5.56%	94.44%	5.71%	94.29%
RDA_SIA	247	88	159	64.37%	62.75%	4 (2.5%)	155 (97.5%)	8.18%	91.82%	7.74%	92.26%
TOTAL adaptive	604	263	341	56.46%	54.64%	11 (3.2%)	330 (96.8%)	0.0671	92.38%	7.27%	92.73%

## Sheet: Table S7 adapt protein-coding
Prot_ID	RDA_SIA_ALAN	RDA_DISP	RDA_ENV	RDA_CLUTCH	bayescan	pcadapt	location	preferred name	Description
XP_048672989.1	XP_048672989.1	XP_048672989.1	XP_048672989.1	XP_048672989.1	0	0	intron	WWOX	KR domain
XP_048673189.1	0	XP_048673189.1	XP_048673189.1	0	0	0	intron	CSNK1D	casein kinase
XP_048673195.1	0	XP_048673195.1	XP_048673195.1	0	0	0	intron	0	0
XP_048673236.1	0	0	XP_048673236.1	0	0	0	intron	XCL1	Intercrine alpha family (small cytokine C-X-C) (chemokine CXC).
XP_048673420.1	0	XP_048673420.1	0	0	0	0	intron	CEP112	Domain of unknown function (DUF4485)
XP_048673563.1	XP_048673563.1	0	0	XP_048673563.1	XP_048673563.1	0	intron	RAB11FIP4	RAB11 family interacting protein 4
XP_048673659.1	0	XP_048673659.1	0	0	0	0	intron	TNXB	Fibronectin type 3 domain
XP_048673665.1	XP_048673665.1	XP_048673665.1	XP_048673665.1	XP_048673665.1	0	0	exon	KIF19	Kinesin-like protein KIF19
XP_048673675.1	0	0	0	0	0	XP_048673675.1	intron	NPLOC4	Nuclear protein localization
XP_048674074.1	XP_048674074.1	0	0	0	0	0	exon	LOC125621330	DUF3585
XP_048674128.1	0	XP_048674128.1	XP_048674128.1	0	0	0	intron	LSAMP	Limbic system-associated membrane protein
XP_048674189.1	XP_048674189.1	0	XP_048674189.1	0	0	0	intron	GAS7	Growth arrest-specific
XP_048674197.1	XP_048674197.1	XP_048674197.1	0	XP_048674197.1	0	0	intron	CACNG5	Regulates the gating properties of AMPA-selective glutamate receptors (AMPARs). Modulates their gating properties by accelerating their rates of activation, deactivation and desensitization. Displays subunit-specific AMPA receptor regulation. Shows specificity for GRIA1, GRIA4 and the long isoform of GRIA2. Thought to stabilize the calcium channel in an inactivated (closed) state
XP_048674213.1	0	0	0	0	XP_048674213.1	XP_048674213.1	intron	B4GALT4	N-terminal region of glycosyl transferase group 7
XP_048674509.1	XP_048674509.1	XP_048674509.1	XP_048674509.1	XP_048674509.1	0	0	intron	MAB21L3	Mab-21
XP_048674721.1	0	0	0	0	XP_048674721.1	0	intron	ZNF41	Zinc finger protein
XP_048674891.1	XP_048674891.1	0	0	0	0	0	intron	SLC39A11	Solute carrier family 39 member 11
XP_048675031.1	0	XP_048675031.1	XP_048675031.1	XP_048675031.1	0	0	intron	BTN1A1	Butyrophilin subfamily 1 member A1-like
XP_048675036.1	XP_048675036.1	XP_048675036.1	XP_048675036.1	XP_048675036.1	0	0	intron	-	negative regulation of activated T cell proliferation
XP_048675165.1	0	XP_048675165.1	XP_048675165.1	XP_048675165.1	0	0	intron	ZNF41	Zinc finger protein
XP_048675362.1	0	0	XP_048675362.1	0	0	0	intron	LPIN3	lipin, N-terminal conserved region
XP_048675389.1	XP_048675389.1	0	0	XP_048675389.1	XP_048675389.1	0	intron	DCAF11	DDB1- and CUL4-associated factor 11
XP_048675402.1	0	XP_048675402.1	0	0	0	0	intron	NCOA3	Nuclear receptor coactivator 3
XP_048675412.1	0	XP_048675412.1	0	0	0	0	intron	SULF2	Sulfatase protein
XP_048675843.1	XP_048675843.1	0	0	0	0	0	intron	MAN1A2	Glycosyl hydrolase family 47
XP_048676090.1	0	0	0	XP_048676090.1	0	0	intron	REM1	Ras family
XP_048676255.1	XP_048676255.1	0	XP_048676255.1	XP_048676255.1	XP_048676255.1	0	intron	ACTR5	actin-related protein 5
XP_048676259.1	XP_048676259.1	XP_048676259.1	XP_048676259.1	XP_048676259.1	XP_048676259.1	0	intron	SHANK3	guanylate kinase-associated protein clustering
XP_048676408.1	XP_048676408.1	0	0	XP_048676408.1	0	0	intron	ZNF831	Zinc finger protein 831
XP_048676421.1	0	0	XP_048676421.1	0	0	0	intron	CHD6	chromodomain helicase DNA binding protein 6
XP_048676489.1	XP_048676489.1	0	0	0	0	0	intron	0	0
XP_048676526.1	XP_048676526.1	XP_048676526.1	XP_048676526.1	0	0	0	intron	PIEZO2	Piezo
XP_048677294.1	0	XP_048677294.1	XP_048677294.1	0	0	0	intron	ANKRD13A	ankyrin repeat
XP_048677515.1	XP_048677515.1						exon	RASL10A	ras-like protein family member 10A
XP_048677617.1	XP_048677617.1	0	0	0	0	0	intron	B3GNT4	UDP-GlcNAc betaGal beta-1,3-N-acetylglucosaminyltransferase 4
XP_048677712.1	0	XP_048677712.1	0	0	0	0	intron	KIAA1671	Tankyrase binding protein C terminal domain
XP_048677743.1	XP_048677743.1						intron	SMPD4	sphingomyelin phosphodiesterase 4
XP_048678234.1	0	0	0	XP_048678234.1	0	0	intron	TMEM132C	Transmembrane protein 132C
XP_048678407.1	XP_048678407.1	0	0	0	0	0	intron	NEK6	Kinase-like
XP_048678416.1	XP_048678416.1	0	0	0	0	0	intron	PSMB7	subunit, beta
XP_048678708.1	0	0	XP_048678708.1	0	0	0	intron	APOBEC1	APOBEC-like C-terminal domain
XP_048678743.1	0	0	XP_048678743.1	0	0	0	intron	MVB12B	Multivesicular body subunit 12
XP_048679116.1	0	XP_048679116.1	0	XP_048679116.1	0	0	intron	RXRA	Nuclear/hormone receptor activator site AF-1
XP_048679153.1	0	XP_048679153.1	0	XP_048679153.1	0	0	intron	FIBCD1	Fibrinogen C domain containing 1
XP_048679223.1	XP_048679223.1	XP_048679223.1	XP_048679223.1	XP_048679223.1	0	XP_048679223.1	exon-3’UTR	PTGES	Prostaglandin E synthase
XP_048679301.1	0	0	0	0	XP_048679301.1	0	intron	MAMDC4	MAM domain containing 4
XP_048679637.1	XP_048679637.1						intron	ALDOC	fructose-bisphosphate aldolase C
XP_048679647.1	0	XP_048679647.1	XP_048679647.1	0	0	0	intron	LAT2	Linker for activation of T-cells family member 2
XP_048679884.1	0	0	0	XP_048679884.1	0	0	intron	HSF5	Heat shock factor protein 5
XP_048679902.1	0	0	0	0	XP_048679902.1	XP_048679902.1	intron	STX1A	Belongs to the syntaxin family
XP_048680234.1	XP_048680234.1	0	0	0	0	0	intron	RFFL	domain containing E3 ubiquitin protein ligase
XP_048680395.1	0	0	0	0	0	XP_048680395.1	intron	TMEM132E	Transmembrane protein family 132
XP_048680399.1	XP_048680399.1						intron	SSC4D	scavenger receptor cysteine-rich domain-containing group B protein
XP_048680477.1	XP_048680477.1	XP_048680477.1	XP_048680477.1	XP_048680477.1	0	0	intron	BCAS3	sequence 3
XP_048680523.1	XP_048680523.1	XP_048680523.1	XP_048680523.1	0	0	0	intron	PLCH2	phospholipase C
XP_048680634.1	XP_048680634.1	XP_048680634.1	XP_048680634.1	XP_048680634.1	0	0	intron	PRKCZ	Protein kinase C, zeta
XP_048680808.1	0	XP_048680808.1	XP_048680808.1	XP_048680808.1	0	0	intron	AJAP1	Adherens junctions associated protein 1
XP_048681054.1	XP_048681054.1	0	XP_048681054.1	0	0	0	intron	KAZN	Kazrin, periplakin interacting protein
XP_048681073.1	XP_048681073.1	0	0	0	0	0	exon	TTLL10	Tubulin-tyrosine ligase family
XP_048681100.1	0	0	XP_048681100.1	0	0	0	intron	-	Trypsin-like serine protease
XP_048681319.1	XP_048681319.1	XP_048681319.1	XP_048681319.1	XP_048681319.1	0	0	intron	FSCN3	Fascin domain
XP_048681321.1	XP_048681321.1	0	XP_048681321.1	0	XP_048681321.1	0	intron	EIF4G3	Eukaryotic translation initiation factor 4 gamma
XP_048682026.1	0	0	0	XP_048682026.1	0	0	intron	ZDHHC18	Palmitoyltransferase
XP_048682116.1	0	XP_048682116.1	0	XP_048682116.1	0	0	intron	HIVEP3	Human immunodeficiency virus type I enhancer binding protein 3
XP_048682605.1	0	0	XP_048682605.1	0	0	0	intron	CPNE5	Copine family member IX
XP_048682611.1	XP_048682611.1	0	XP_048682611.1	0	0	0	intron	-	Tubulin/FtsZ family, GTPase domain
XP_048682638.1	XP_048682638.1	0	XP_048682638.1	0	0	0	intron	SHISA4	Wnt and FGF inhibitory regulator
XP_048682780.1	XP_048682780.1	XP_048682780.1	XP_048682780.1	XP_048682780.1	XP_048682780.1	XP_048682780.1	intron	FAM19A3	TAFA family (TAFA3)
XP_048682828.1	0	XP_048682828.1	0	0	0	0	intron	LZTR1	Kelch motif
XP_048682882.1	XP_048682882.1	0	XP_048682882.1	0	0	0	exon	PTPRB	Receptor-type tyrosine-protein phosphatase V-like (LOC125625181)
XP_048683203.1	0	XP_048683203.1	0	0	0	0	intron	NCAM1	Neural cell adhesion molecule 1
XP_048683220.1	XP_048683220.1	XP_048683220.1	XP_048683220.1	XP_048683220.1	0	XP_048683220.1	intron	SLC37A2	Solute carrier family 37
XP_048683221.1	XP_048683221.1	XP_048683221.1	0	0	0	0	intron	PKNOX2	PBX knotted 1 homeobox 2
XP_048683235.1	XP_048683235.1						intron	PDE3A	cGMP-inhibited 3'%2C5'-cyclic phosphodiesterase A
XP_048683254.1	0	XP_048683254.1	0	0	0	0	intron	PHLDB1	Pleckstrin homology-like domain family B member 1
XP_048683262.1	0	XP_048683262.1	0	0	0	0	intron	TREH	Trehalase
XP_048683713.1	0	0	0	0	XP_048683713.1	XP_048683713.1	intron	MEF2D	enhancer factor 2D
XP_048683795.1	XP_048683795.1	0	0	0	0	0	intron	PHLDB2	Pleckstrin homology-like domain family B member
XP_048683955.1	XP_048683955.1	0	0	0	0	0	intron	KIRREL	Immunoglobulin like
XP_048684627.1	0	0	XP_048684627.1	0	0	0	intron	IQGAP3	GTPase-activator protein for Ras-like GTPase
XP_048684659.1	0	XP_048684659.1	0	0	0	0	intron	RPRD2	regulation of nuclear pre-mRNA
XP_048684751.1	0	XP_048684751.1	0	0	0	0	exon	LOC125626108	TILa domain
XP_048684972.1	0	XP_048684972.1	0	0	0	0	intron	FGF17	Fibroblast growth factor 17
XP_048685272.1	0	0	XP_048685272.1	0	0	0	intron	RHOBTB2	Rho-related BTB
XP_048685569.1	0	XP_048685569.1	0	0	0	0	exon	CNNM4	Cyclin and CBS domain divalent metal cation transport mediator 4
XP_048685583.1	0	XP_048685583.1	0	0	0	0	intron	IL36RN	Interleukin-36 receptor antagonist protein-like
XP_048686119.1	XP_048686119.1	0	XP_048686119.1	0	0	0	intron	MPP2	MAGUK p55 subfamily member 2
XP_048686342.1	XP_048686342.1	0	XP_048686342.1	0	0	0	intron	ASIC2	Belongs to the amiloride-sensitive sodium channel (TC 1.A.6) family
XP_048686578.1	XP_048686578.1	0	0	0	0	0	intron	BTBD2	BTB (POZ) domain containing 2
XP_048686697.1	XP_048686697.1	XP_048686697.1	XP_048686697.1	XP_048686697.1	0	0	exon-5’UTR	OCLN	Occludin homology domain (LOC125627038)
XP_048687009.1	XP_048687009.1	XP_048687009.1	XP_048687009.1	0	0	0	intron	UNC13A	Unc-13 homolog
XP_048687171.1	0	0	0	0	0	XP_048687171.1	intron	INSR	Furin-like cysteine rich region
XP_048687359.1	0	0	XP_048687359.1	0	0	0	intron	TYK2	Protein kinase
XP_048687616.1	0	0	0	0	XP_048687616.1	0	exon	PODNL1	Leucine Rich repeats (2 copies)
XP_048687641.1	0	0	0	0	0	XP_048687641.1	exon	c3	A-macroglobulin receptor
XP_048687876.1	XP_048687876.1						intron	ZSWIM4	zinc finger SWIM domain-containing protein 4
XP_048688324.1	XP_048688324.1	XP_048688324.1	XP_048688324.1	XP_048688324.1	0	XP_048688324.1	intron	MAP2K7	JUN kinase kinase activity
XP_048688538.1	0	0	0	XP_048688538.1	0	0	intron	IGSF1	Immunoglobulin superfamily member 1-like
XP_048688540.1	0	0	0	0	0	XP_048688540.1	intron	CCDC114	Coiled-coil domain containing 114
XP_048688626.1	0	0	0	0	0	XP_048688626.1	intron	EMP3	Epithelial membrane protein 3
XP_048688733.1	0	0	XP_048688733.1	0	0	0	intron	GLTSCR1	Glioma tumor suppressor candidate region gene 1
XP_048688908.1	0	XP_048688908.1	0	0	0	0	intron	RBFOX2	RNA binding protein fox-1 homolog
XP_048689350.1	0	XP_048689350.1	0	XP_048689350.1	0	0	exon	TBC1D17	TBC1 domain family member
XP_048689483.1	0	0	0	XP_048689483.1	0	0	intron	RYR1	ryanodine receptor
XP_048689508.1	0	0	0	0	XP_048689508.1	0	intron	0	0
XP_048689634.1	0	0	0	XP_048689634.1	0	0	intron	POLR2A	DNA-directed RNA polymerase II subunit
XP_048689658.1	XP_048689658.1	0	XP_048689658.1	0	XP_048689658.1	XP_048689658.1	Exon-intron	LOC125628601	Zinc finger protein
XP_048689717.1	0	0	0	0	XP_048689717.1	0	intron	-	krueppel associated box
XP_048689731.1	XP_048689731.1	0	XP_048689731.1	0	XP_048689731.1	0	exon	-	krueppel associated box
XP_048691494.1	XP_048691494.1	0	0	0	0	0	intron	AMDHD1	Amidohydrolase family
XP_048691653.1	0	0	0	XP_048691653.1	0	0	intron	NAV3	Neuron navigator 3
XP_048692016.1	0	0	XP_048692016.1	0	0	0	intron	CNTN1	Contactin 1
XP_048692026.1	XP_048692026.1	0	0	0	0	XP_048692026.1	intron	IMMP2L	Mitochondrial inner membrane protease subunit 2
XP_048692069.1	XP_048692069.1	XP_048692069.1	XP_048692069.1	XP_048692069.1	0	0	intron	FOXP2	Forkhead box protein P2
XP_048692153.1	XP_048692153.1	0	XP_048692153.1	XP_048692153.1	0	XP_048692153.1	intron	CADPS2	dependent secretion activator 2
XP_048692171.1	0	0	XP_048692171.1	0	0	0	intron	ALG12	Alg9-like mannosyltransferase family
XP_048692305.1	0	0	0	0	XP_048692305.1	0	intron	CDHR3	Cadherin-related family member 3
XP_048692356.1	0	0	0	XP_048692356.1	0	0	intron	RELN	Reelin isoform
XP_048692368.1	0	0	0	XP_048692368.1	0	0	intron	-	DNA binding
XP_048692374.1	0	XP_048692374.1	0	0	0	0	intron	PMPCB	Belongs to the peptidase M16 family
XP_048692505.1	XP_048692505.1	XP_048692505.1	XP_048692505.1	XP_048692505.1	0	0	intron	FRMD4A	FERM domain-containing protein 4A
XP_048692655.1	XP_048692655.1	0	0	0	0	0	intron	PLXNA4	chemorepulsion of branchiomotor axon
XP_048692660.1	0	XP_048692660.1	0	0	0	0	intron	EXOC4	Exocyst complex component
XP_048692948.1	XP_048692948.1						intron	LOC125630861	uncharacterized protein LOC125630861
XP_048693156.1	0	XP_048693156.1	0	0	0	0	intron	LRRC72	Leucine-rich repeat
XP_048693211.1	XP_048693211.1	XP_048693211.1	XP_048693211.1	XP_048693211.1	0	0	intron	COL22A1	Thrombospondin N-terminal -like domains.
XP_048693336.1	0	0	0	0	XP_048693336.1	0	intron	WNT9A	Ligand for members of the frizzled family of seven transmembrane receptors
XP_048693396.1	XP_048693396.1	0	0	0	0	0	intron	GHRH-LR	Domain present in hormone receptors
XP_048693406.1	0	0	XP_048693406.1	0	0	0	intron	FAM188B	Family with sequence similarity 188, member B
XP_048693422.1	XP_048693422.1	0	XP_048693422.1	0	0	0	intron	GARS	Glycyl-tRNA synthetase
XP_048693560.1	XP_048693560.1	XP_048693560.1	XP_048693560.1	0	0	0	intron	LMBR1	Limb development membrane protein 1
XP_048693627.1	0	0	0	0	0	XP_048693627.1	intron	WDR37	WD repeat domain 37
XP_048693789.1	XP_048693789.1	XP_048693789.1	XP_048693789.1	XP_048693789.1	XP_048693789.1	0	intron	GPR158	receptor 158
XP_048693944.1	XP_048693944.1	0	0	XP_048693944.1	0	0	intron	CACNB2	Voltage gated calcium channel subunit beta domain 4Aa N terminal
XP_048694397.1	0	0	0	0	0	XP_048694397.1	intron	SKAP2	phosphoprotein 2
XP_048694594.1	XP_048694594.1	XP_048694594.1	XP_048694594.1	XP_048694594.1	0	0	intron	RBMS3	RNA recognition motif
XP_048694624.1	0	0	XP_048694624.1	0	0	0	intron	CNOT10	CCR4-NOT transcription complex subunit 10
XP_048694635.1	0	0	XP_048694635.1	0	0	0	intron	-	DNA binding
XP_048694680.1	0	0	XP_048694680.1	0	0	0	intron	ARRB1	V2 vasopressin receptor binding
XP_048694794.1	0	0	XP_048694794.1	0	0	0	intron	ULK4	regulation of protein kinase C signaling
XP_048695018.1	XP_048695018.1	0	0	0	0	0	exon-3’UTR	FBKP9	FKBP-type peptidyl-prolyl cis-trans isomerase
XP_048695154.1	XP_048695154.1	XP_048695154.1	XP_048695154.1	XP_048695154.1	XP_048695154.1	0	intron	NME8	NDK
XP_048695193.1	XP_048695193.1						intron	ABCA13	ATP-binding cassette sub-family A member 13
XP_048695462.1	0	0	0	0	XP_048695462.1	0	intron	SLC12A7	Solute carrier family 12
XP_048695470.1	XP_048695470.1	XP_048695470.1	XP_048695470.1	XP_048695470.1	XP_048695470.1	0	intron	CLPTM1L	Cleft lip and palate transmembrane protein 1-like protein
XP_048695500.1	XP_048695500.1	0	0	XP_048695500.1	XP_048695500.1	0	intron	ADCY2	Adenylate cyclase
XP_048695551.1	0	0	0	0	0	XP_048695551.1	intron	CTNND2	dendritic spine morphogenesis
XP_048695594.1	XP_048695594.1	XP_048695594.1	0	XP_048695594.1	0	0	intron	CDH18	Cadherin repeats.
XP_048695630.1	0	XP_048695630.1	0	XP_048695630.1	0	0	intron	CDH20	Cadherins are calcium-dependent cell adhesion proteins
XP_048695641.1	0	XP_048695641.1	0	XP_048695641.1	0	0	intron	RNF152	zinc-RING finger domain
XP_048695793.1	0	XP_048695793.1	0	XP_048695793.1	0	0	intron	HIVEP1	Human immunodeficiency virus type I enhancer binding protein 1
XP_048695959.1	XP_048695959.1	XP_048695959.1	XP_048695959.1	XP_048695959.1	0	0	intron	DCDC2	Doublecortin domain-containing protein 2
XP_048695984.1	0	0	XP_048695984.1	0	0	0	intron	LRRC16A	Capping protein regulator and myosin 1 linker 1
XP_048696741.1	XP_048696741.1	XP_048696741.1	XP_048696741.1	XP_048696741.1	XP_048696741.1	XP_048696741.1	intron	NKAIN3	Na K transporting ATPase interacting 3
XP_048696759.1	0	0	0	0	0	XP_048696759.1	intron	PDE7A	Phosphodiesterase 7A
XP_048697255.1	XP_048697255.1	0	0	0	0	0	intron	SDC2	Syndecan domain
XP_048697474.1	XP_048697474.1	XP_048697474.1	XP_048697474.1	0	0	0	intron	CSMD3	CUB and sushi
XP_048697555.1	XP_048697555.1	XP_048697555.1	XP_048697555.1	XP_048697555.1	0	0	intron	MTSS1	Metastasis suppressor
XP_048697668.1	0	XP_048697668.1	0	0	0	0	exon	ZFAT	zinc finger
XP_048697736.1	XP_048697736.1	XP_048697736.1	XP_048697736.1	XP_048697736.1	0	0	intron	TSNARE1	Syntaxin-like protein
XP_048697802.1	XP_048697802.1	0	0	0	0	0	intron	ARHGAP39	MyTH4 domain
XP_048698041.1	0	XP_048698041.1	XP_048698041.1	XP_048698041.1	0	0	intron	-	Ribonuclease H protein
XP_048698101.1	XP_048698101.1	0	0	XP_048698101.1	0	0	exon-5’UTR	GIMAP2	GTPase IMAP family member
XP_048698220.1	0	XP_048698220.1	0	XP_048698220.1	0	0	intron	ACSS1	acyl-CoA synthetase short-chain family member 1
XP_048698394.1	0	0	XP_048698394.1	0	0	0	intron	-	Domain of unknown function (DUF296)
XP_048698440.1	XP_048698440.1	XP_048698440.1	0	0	0	0	intron	RRBP1	Ribosome receptor lysine/proline rich region
XP_048698505.1	XP_048698505.1						intron	PLCB4	1-phosphatidylinositol 4%2C5-bisphosphate phosphodiesterase beta-4 isoform X1
XP_048698728.1	XP_048698728.1	0	0	0	0	0	intron	USP34	protein K48-linked deubiquitination
XP_048698738.1	XP_048698738.1	0	0	0	0	0	intron	AHSA2	protein ATPase homolog 2
XP_048698802.1	0	XP_048698802.1	0	0	0	0	intron	TTC7A	tetratricopeptide repeat
XP_048698829.1	0	XP_048698829.1	0	XP_048698829.1	0	0	intron	ERLEC1	Endoplasmic reticulum lectin 1
XP_048698888.1	0	0	0	0	0	XP_048698888.1	intron	FSHR	hormone receptor
XP_048698942.1	0	XP_048698942.1	0	0	0	0	intron	SRBD1	S1 RNA binding domain 1
XP_048699000.1	0	0	0	0	0	XP_048699000.1	intron	UBR2	Ubiquitin protein ligase E3 component n-recognin 2
XP_048699425.1	0	0	XP_048699425.1	0	0	0	intron	DAAM2	activator of morphogenesis 2
XP_048699580.1	0	0	XP_048699580.1	0	0	0	intron	NANP	HAD-hyrolase-like
XP_048699607.1	0	0	0	0	0	XP_048699607.1	intron	MEMO1	Memo-like protein
XP_048699616.1	0	0	0	0	0	XP_048699616.1	intron	-	DNA binding
XP_048699859.1	0	0	0	0	0	XP_048699859.1	intron	TAF5L	TAF5-like RNA polymerase II p300 CBP-associated
XP_048699966.1	0	XP_048699966.1	0	XP_048699966.1	0	0	intron	UNC93A	unc-93 homolog A
XP_048700809.1	XP_048700809.1	XP_048700809.1	0	XP_048700809.1	XP_048700809.1	0	intron	ARMC2	Armadillo repeat containing 2
XP_048700936.1	0	0	XP_048700936.1	0	0	0	intron	EPHA7	Fibronectin type 3 domain
XP_048701057.1	0	XP_048701057.1	0	XP_048701057.1	0	0	exon	TBX18	Domain first found in the mice T locus (Brachyury) protein
XP_048701071.1	0	0	0	0	0	XP_048701071.1	intron	ME1	malic enzyme
XP_048701286.1	0	0	0	0	0	XP_048701286.1	intron	CSMD1	CUB and sushi
XP_048701417.1	0	0	0	0	0	XP_048701417.1	intron	ASAP2	ArfGAP with SH3 domain, ankyrin repeat and PH domain 2
XP_048701585.1	XP_048701585.1	XP_048701585.1	XP_048701585.1	0	0	0	intron	KLHL29	BTB And C-terminal Kelch
XP_048701654.1	XP_048701654.1	XP_048701654.1	XP_048701654.1	XP_048701654.1	0	0	intron	SUPT3H	SPT3 homolog, SAGA and STAGA complex component
XP_048701715.1	XP_048701715.1	0	XP_048701715.1	XP_048701715.1	0	0	intron	PKHD1	Polycystic kidney and hepatic disease 1 (autosomal recessive)
XP_048701811.1	XP_048701811.1	0	0	XP_048701811.1	XP_048701811.1	0	intron	EFR3B	EFR3 homolog B
XP_048701966.1	XP_048701966.1	XP_048701966.1	XP_048701966.1	XP_048701966.1	0	XP_048701966.1	intron	COL19A1	Thrombospondin N-terminal -like domains.
XP_048701972.1	0	0	0	XP_048701972.1	0	0	intron	BAI3	Adhesion G protein-coupled receptor B3
XP_048701998.1	XP_048701998.1						intron	OTOF	otoferlin isoform X1
XP_048702040.1	XP_048702040.1	XP_048702040.1	XP_048702040.1	XP_048702040.1	XP_048702040.1	XP_048702040.1	intron	ATP8A2	Phospholipid-translocating ATPase N-terminal
XP_048702287.1	0	XP_048702287.1	0	0	0	0	intron	CTNNA2	Vinculin family
XP_048702348.1	0	0	XP_048702348.1	0	0	0	intron	C20orf194	Chromosome 20 open reading frame 194
XP_048702385.1	0	0	XP_048702385.1	0	0	0	intron	EXOC6B	Exocyst complex component 6B
XP_048702460.1	XP_048702460.1	XP_048702460.1	XP_048702460.1	XP_048702460.1	0	0	intron	FLT1	Tyrosine kinase, catalytic domain
XP_048702470.1	XP_048702470.1	XP_048702470.1	0	0	0	XP_048702470.1	intron	VPS16	Vps16, N-terminal region
XP_048702544.1	XP_048702544.1	XP_048702544.1	0	XP_048702544.1	0	XP_048702544.1	intron	MTUS2	Tumor suppressor candidate
XP_048702633.1	0	0	0	XP_048702633.1	0	0	intron	C4orf22	Domain of unknown function (DUF4464)
XP_048702753.1	XP_048702753.1	0	XP_048702753.1	0	0	0	intron	SLC4A4	Band 3 cytoplasmic domain
XP_048702865.1	0	0	0	0	0	XP_048702865.1	intron	NR3C2	Nuclear receptor subfamily 3, group C, member 2
XP_048702907.1	XP_048702907.1	XP_048702907.1	XP_048702907.1	XP_048702907.1	XP_048702907.1	0	intron	SLC10A7	Solute carrier family 10, member 7
XP_048702981.1	XP_048702981.1	0	0	0	0	0	intron	GRID2	Glutamate receptor, ionotropic
XP_048703138.1	XP_048703138.1	0	0	XP_048703138.1	0	0	intron	PDS5B	Sister chromatid cohesion protein PDS5 homolog B
XP_048703321.1	0	0	0	XP_048703321.1	0	0	intron	FBXW7	F-box and WD repeat domain containing 7
XP_048703348.1	0	0	0	0	0	XP_048703348.1	exon-3’UTR	KL	Belongs to the glycosyl hydrolase 1 family
XP_048703433.1	0	0	XP_048703433.1	0	0	0	intron	GUCY1B3	Guanylate cyclase
XP_048703444.1	0	0	0	XP_048703444.1	0	0	intron	SYT1	Protein kinase C conserved region 2 (CalB)
XP_048704233.1	XP_048704233.1	0	0	XP_048704233.1	XP_048704233.1	0	intron	SRD5A3	Steroid 5 alpha-reductase 3
XP_048704615.1	0	XP_048704615.1	0	XP_048704615.1	0	0	intron	PCDH7	Protocadherin 7
XP_048704798.1	XP_048704798.1	0	0	XP_048704798.1	0	0	intron	BOD1L1	Biorientation of chromosomes in cell division
XP_048705181.1	0	XP_048705181.1	0	0	0	0	intron	EIF2AK3	eukaryotic translation initiation factor
XP_048705215.1	0	0	0	XP_048705215.1	0	0	intron	FAM219A	Family with sequence similarity 219 member A
XP_048705357.1	0	0	0	XP_048705357.1	0	0	intron	RPS11	rRNA binding
XP_048705527.1	XP_048705527.1	0	0	0	0	0	intron	CENPH	Centromere protein H
XP_048705650.1	0	0	XP_048705650.1	0	0	0	intron	NCBP1	Nuclear cap-binding protein subunit 1
XP_048705776.1	XP_048705776.1	XP_048705776.1	XP_048705776.1	XP_048705776.1	0	0	intron	CTIF	Translation initiation factor
XP_048705905.1	0	0	XP_048705905.1	0	0	0	intron	NFIB	nuclear factor
XP_048706215.1	0	XP_048706215.1	0	XP_048706215.1	0	0	intron	CNTFR	Ciliary neurotrophic factor receptor
XP_048706669.1	0	0	0	0	0	XP_048706669.1	intron	GTF2F2	General transcription factor IIF subunit 2
XP_048706891.1	0	0	XP_048706891.1	0	0	0	exon-3’UTR	BC067074	Laminin G domain (LOC125636981)
XP_048706957.1	0	XP_048706957.1	0	0	0	0	intron	CHSY3	Chondroitin sulfate synthase 3
XP_048707191.1	0	XP_048707191.1	0	0	0	0	intron	FBP2	Belongs to the FBPase class 1 family
XP_048707208.1	0	XP_048707208.1	0	XP_048707208.1	0	0	intron	IGFBPL1	Insulin-like growth factor binding protein-like 1
XP_048707472.1	0	0	0	0	0	XP_048707472.1	intron	SLC28A3	Solute carrier family 28
XP_048707638.1	0	0	XP_048707638.1	0	0	0	intron	ZNF131	Zinc finger protein
XP_048707811.1	0	XP_048707811.1	0	0	0	0	intron	TARS	Threonyl-tRNA synthetase
XP_048707814.1	0	XP_048707814.1	0	0	0	0	intron	PCDH9	Protocadherin
XP_048707953.1	0	XP_048707953.1	XP_048707953.1	0	0	0	intron	DAAM1	activator of morphogenesis 1
XP_048707955.1	0	0	0	XP_048707955.1	0	0	intron	RTN1	Reticulon
XP_048709061.1	XP_048709061.1	0	0	0	0	0	intron	ANO9	Calcium-activated chloride channel
XP_048709071.1	XP_048709071.1	0	0	0	0	0	intron	PYGL	Phosphorylase is an important allosteric enzyme in carbohydrate metabolism. Enzymes from different sources differ in their regulatory mechanisms and in their natural substrates. However, all known phosphorylases share catalytic and structural properties
XP_048709213.1	0	XP_048709213.1	0	0	0	0	intron	GPC6	Cell surface proteoglycan that bears heparan sulfate
XP_048709220.1	XP_048709220.1	XP_048709220.1	XP_048709220.1	XP_048709220.1	XP_048709220.1	0	intron	ITPK1	Inositol-tetrakisphosphate 1-kinase
XP_048709302.1	XP_048709302.1	0	0	0	0	0	intron	RIN3	Ras and Rab interactor 3
XP_048709412.1	XP_048709412.1	XP_048709412.1	XP_048709412.1	XP_048709412.1	0	0	intron	CLDN10	PMP-22/EMP/MP20/Claudin family
XP_048709828.1	0	0	XP_048709828.1	0	0	0	intron	RGS6	regulator of G-protein signaling 6
XP_048709946.1	XP_048709946.1	0	0	0	0	0	intron	-	-
XP_048710104.1	XP_048710104.1	0	XP_048710104.1	0	0	0	intron	KLHDC1	Kelch domain containing 1
XP_048710229.1	XP_048710229.1	0	0	XP_048710229.1	0	0	intron	PCCA	carboxylase, alpha
XP_048710513.1	0	XP_048710513.1	0	XP_048710513.1	0	0	exon-5’UTR	DUSP8	phosphatase 8
XP_048710595.1	0	0	0	0	XP_048710595.1	0	intron	RYR3	ryanodine receptor
XP_048710850.1	0	XP_048710850.1	0	0	0	0	intron	MYO16	Neuronal tyrosine-phosphorylated phosphoinositide-3-kinase adapter
XP_048711086.1	0	0	0	0	0	XP_048711086.1	exon-3'UTR	CARKD	Carbohydrate kinase
XP_048711376.1	0	0	0	0	0	XP_048711376.1	intron	TUBGCP3	Gamma-tubulin complex is necessary for microtubule nucleation at the centrosome
XP_048711695.1	XP_048711695.1	0	0	0	XP_048711695.1	0	intron	SYT16	Protein kinase C conserved region 2 (CalB)
XP_048711757.1	0	0	0	0	0	XP_048711757.1	intron	NRDE2	NRDE-2, necessary for RNA interference, domain containing
XP_048712124.1	0	XP_048712124.1	0	0	0	0	intron	NEURL1	Neuralized E3 ubiquitin protein ligase 1
XP_048712197.1	0	0	XP_048712197.1	0	0	0	intron	ADAM12	ADAM Cysteine-Rich Domain
XP_048712268.1	0	0	XP_048712268.1	0	0	0	intron	SPTBN2	Spectrin beta
XP_048712316.1	XP_048712316.1						intron	KCNMA1	calcium-activated potassium channel subunit alpha-1 isoform X1
XP_048712630.1	XP_048712630.1	XP_048712630.1	XP_048712630.1	XP_048712630.1	0	0	intron	USP54	Ubiquitin specific peptidase 54
XP_048712870.1	0	0	0	XP_048712870.1	0	0	intron	NCK2	Src homology 3 domains
XP_048713210.1	XP_048713210.1	0	XP_048713210.1	0	0	0	exon	MGEA5	beta-N-acetylglucosaminidase
XP_048713333.1	0	0	XP_048713333.1	0	0	0	intron	INPP5A	Inositol polyphosphate phosphatase, catalytic domain homologues
XP_048713603.1	0	0	0	0	XP_048713603.1	0	intron	TMEM110	Transmembrane protein 110
XP_048713782.1	0	0	XP_048713782.1	0	0	0	intron	NCKIPSD	protein with SH3 domain
XP_048713819.1	XP_048713819.1	XP_048713819.1	XP_048713819.1	0	XP_048713819.1	0	intron	ERC2	ERC protein 2
XP_048714035.1	0	0	XP_048714035.1	0	0	0	intron	WDFY4	Beige/BEACH domain
XP_048714252.1	0	0	0	0	0	XP_048714252.1	intron	adgra1	G-protein-coupled receptor proteolytic site domain
XP_048714257.1	0	XP_048714257.1	0	0	0	0	intron	SGPL1	sphingosine-1-phosphate lyase 1
XP_048714414.1	XP_048714414.1	XP_048714414.1	XP_048714414.1	XP_048714414.1	0	0	intron	FAM19A1	Family with sequence similarity 19
XP_048714644.1	0	0	XP_048714644.1	0	0	0	intron	PPAPDC1A	Acid phosphatase homologues
XP_048714934.1	XP_048714934.1	0	0	XP_048714934.1	0	0	intron	SYNPO2L	Domain present in PSD-95, Dlg, and ZO-1/2.
XP_048714955.1	0	0	XP_048714955.1	0	0	0	intron	PTPRG	Protein tyrosine phosphatase, receptor type, G
XP_048714996.1	XP_048714996.1	XP_048714996.1	XP_048714996.1	XP_048714996.1	0	0	intron	CALHM2	Calcium homeostasis modulator
XP_048715086.1	0	XP_048715086.1	0	0	0	0	intron	PC	Pyruvate carboxylase
XP_048715181.1	XP_048715181.1	XP_048715181.1	XP_048715181.1	0	0	0	intron	PRKG1	cGMP-dependent protein kinase
XP_048715456.1	0	XP_048715456.1	0	0	0	0	intron	SLC25A26	Solute carrier family 25
XP_048715616.1	XP_048715616.1	XP_048715616.1	0	XP_048715616.1	XP_048715616.1	0	intron	DDR2	Discoidin domain receptor tyrosine kinase 2
XP_048715711.1	0	0	0	0	0	XP_048715711.1	intron	CSF1R	factor 1 receptor
XP_048715743.1	XP_048715743.1	0	0	0	0	0	intron	DHRSX	Dehydrogenase reductase SDR family
XP_048715787.1	XP_048715787.1	0	0	0	0	0	intron	-	DNA binding
XP_048715792.1	XP_048715792.1	0	XP_048715792.1	0	0	XP_048715792.1	intron	PIK3R3	1-phosphatidylinositol-3-kinase regulator activity
XP_048715966.1	0	0	0	0	0	XP_048715966.1	intron	FLT4	Belongs to the protein kinase superfamily. Tyr protein kinase family. CSF-1 PDGF receptor subfamily
XP_048715998.1	XP_048715998.1	XP_048715998.1	XP_048715998.1	XP_048715998.1	0	0	intron	TENM2	GHH signature containing HNH/Endo VII superfamily nuclease toxin
XP_048716045.1	0	0	XP_048716045.1	0	0	0	intron	CPLX1	Synaphin protein
XP_048716442.1	0	0	XP_048716442.1	0	0	0	intron	SHROOM2	eye pigment granule organization
XP_048716518.1	0	XP_048716518.1	0	XP_048716518.1	0	0	intron	SGCD	Sarcoglycan complex subunit protein
XP_048716633.1	0	XP_048716633.1	0	XP_048716633.1	0	0	intron	NUF2	NUF2, NDC80 kinetochore complex component
XP_048717391.1	0	0	0	0	0	XP_048717391.1	intron	NRG2	Neuregulin family
XP_048717522.1	0	XP_048717522.1	XP_048717522.1	0	0	0	intron	DNAJC6	C2 domain of PTEN tumour-suppressor protein
XP_048717548.1	0	0	XP_048717548.1	0	0	0	intron	SLC25A24	Belongs to the mitochondrial carrier (TC 2.A.29) family
XP_048717992.1	XP_048717992.1	0	XP_048717992.1	0	0	XP_048717992.1	intron	TRABD2B	TraB family
XP_048718019.1	XP_048718019.1	0	0	0	0	0	intron	PTPRF	Protein tyrosine phosphatase, catalytic domain
XP_048718088.1	0	0	0	0	0	XP_048718088.1	intron	FGF18	Fibroblast growth factor 18
XP_048718304.1	XP_048718304.1	XP_048718304.1	XP_048718304.1	0	0	0	intron	SLC1A7	Sodium:dicarboxylate symporter family
XP_048718334.1	0	XP_048718334.1	0	0	0	0	intron	GLIS1	zinc finger
XP_048718709.1	XP_048718709.1	0	0	XP_048718709.1	0	0	intron	IFT80	Intraflagellar transport
XP_048718804.1	XP_048718804.1	0	XP_048718804.1	XP_048718804.1	XP_048718804.1	XP_048718804.1	intron	KCNAB1	Potassium voltage-gated channel, shaker-related subfamily, beta member 1
XP_048718895.1	XP_048718895.1	0	0	XP_048718895.1	0	0	intron	TENM1	GHH signature containing HNH/Endo VII superfamily nuclease toxin
XP_048719015.1	0	0	0	XP_048719015.1	0	0	intron	PCDH11X	Protocadherin
XP_048719495.1	XP_048719495.1	0	XP_048719495.1	XP_048719495.1	0	0	intron	DOCK10	marginal zone B cell differentiation
XP_048719751.1	0	0	0	0	0	XP_048719751.1	intron	VPS8	endosomal vesicle fusion
XP_048719951.1	0	0	0	XP_048719951.1	0	0	intron	ZBBX	Zinc finger B-box
XP_048720023.1	XP_048720023.1	XP_048720023.1	XP_048720023.1	XP_048720023.1	0	0	intron	DOCK11	Dedicator of cytokinesis
XP_048720095.1	0	XP_048720095.1	0	XP_048720095.1	0	0	intron	CUL4B	Cullin protein neddylation domain
XP_048720636.1	0	XP_048720636.1	0	0	0	0	intron	NMUR1	Belongs to the G-protein coupled receptor 1 family
XP_048720721.1	0	0	0	0	0	XP_048720721.1	intron	SI	N-terminal barrel of NtMGAM and CtMGAM, maltase-glucoamylase
XP_048720751.1	XP_048720751.1	XP_048720751.1	XP_048720751.1	XP_048720751.1	0	0	intron	RNF128	PA domain
XP_048721287.1	XP_048721287.1	0	0	0	0	0	exon-3'UTR	CHRNG	receptor
XP_048721591.1	XP_048721591.1	XP_048721591.1	XP_048721591.1	XP_048721591.1	0	0	intron	CELF6	positive regulation of mRNA splicing, via spliceosome
XP_048721634.1	0	0	0	0	0	XP_048721634.1	intron	MGRN1	E3 ubiquitin-protein ligase MGRN1
XP_048721775.1	0	0	0	0	0	XP_048721775.1	intron	NTRK3	Neurotrophic receptor tyrosine kinase 3
XP_048722077.1	XP_048722077.1	0	0	0	0	0	intron	PEAK1	atypical kinase 1
XP_048722089.1	XP_048722089.1	XP_048722089.1	0	XP_048722089.1	0	0	intron	NEO1	Immunoglobulin C-2 Type
XP_048722436.1	XP_048722436.1	XP_048722436.1	XP_048722436.1	XP_048722436.1	0	0	intron	CACNA1H	Voltage-dependent T-type calcium channel subunit
XP_048722458.1	XP_048722458.1	XP_048722458.1	XP_048722458.1	XP_048722458.1	0	XP_048722458.1	intron	TRIP4	ASCH domain
XP_048722471.1	XP_048722471.1	XP_048722471.1	0	XP_048722471.1	0	0	intron	SEMA6D	Belongs to the semaphorin family
XP_048723382.1	XP_048723382.1	XP_048723382.1	XP_048723382.1	XP_048723382.1	0	0	intron	CCDC33	Coiled-coil domain containing 33
XP_048724123.1	XP_048724123.1	XP_048724123.1	XP_048724123.1	XP_048724123.1	0	0	intron	APBA2	family A member 2
XP_048724597.1	0	XP_048724597.1	0	0	0	0	intron	ARHGAP15	Rho GTPase activating protein 15
XP_048724707.1	0	0	XP_048724707.1	0	0	0	intron	-	Intermediate filament protein
XP_048724805.1	XP_048724805.1	0		0	0	0	intron	-	Guanine nucleotide exchange factor for Rho/Rac/Cdc42-like GTPases
XP_048724820.1	XP_048724820.1	0	0	0	0	0	intron	ORC2	Origin recognition complex, subunit 2
XP_048724873.1	0	XP_048724873.1	0	0	0	0	intron	CADM2	Cell adhesion molecule 2
XP_048724911.1	XP_048724911.1	0	XP_048724911.1	0	0	0	intron	BTN1A1	Immunoglobulin V-set domain
XP_048724981.1	0	0	XP_048724981.1	0	0	0	intron	KMO	FAD binding domain
XP_048725011.1	XP_048725011.1	0	0	XP_048725011.1	0	0	intron	MYLK	Myosin light chain kinase
XP_048725117.1	XP_048725117.1	0	XP_048725117.1	XP_048725117.1	0	0	intron	KIF5C	Belongs to the TRAFAC class myosin-kinesin ATPase superfamily. Kinesin family
XP_048725121.1	XP_048725121.1	0	XP_048725121.1	XP_048725121.1	0	0	intron	LYPD6B	ly6 PLAUR
XP_048725124.1	XP_048725124.1	0	0	XP_048725124.1	0	0	intron	LRP1B	lipoprotein receptor-related protein 1B
XP_048725632.1	0	XP_048725632.1	XP_048725632.1	XP_048725632.1	0	XP_048725632.1	intron	CD247	CD247 molecule
XP_048725645.1	XP_048725645.1	0	XP_048725645.1	0	0	0	intron	FMNL2	Diaphanous FH3 Domain
XP_048725835.1	0	0	XP_048725835.1	0	0	0	intron	GRB14	Growth factor receptor-bound protein 14
XP_048726480.1	0	0	0	0	0	XP_048726480.1	intron	ABHD10	Abhydrolase domain containing 10
XP_048726801.1	0	0	XP_048726801.1	XP_048726801.1	0	0	intron	BBX	bone development
XP_048726805.1	XP_048726805.1	0	XP_048726805.1	XP_048726805.1	0	0	intron	RNF166	Ring finger protein 166

## Sheet: Table S8 enriched GOs
category	list	GO	description	candidate proteins
BP	RDA_CLUTCH	GO:0002181	cytoplasmic translation	XP_048705357.1
BP	RDA_DISP	GO:0006790	sulfur compound metabolic process	XP_048675412.1, XP_048706957.1, XP_048715086.1
BP	RDA_DISP	GO:0005975	carbohydrate metabolic process	XP_048683262.1, XP_048707191.1, XP_048715086.1
BP	RDA_SIA	GO:1901135	carbohydrate derivative metabolic process	XP_048675843.1, XP_048677617.1, XP_048677743.1, XP_048679637.1, XP_048683235.1, XP_048697255.1, XP_048709071.1
BP	RDA_SIA	GO:0003014	renal system process	XP_048683955.1, XP_048712316.1
BP	RDA_SIA	GO:0007059	chromosome segregation	XP_048678407.1, XP_048705527.1, XP_048724820.1
BP	RDA_SIA	GO:0006355	regulation of DNA-templated transcription	XP_048724820.1
BP	bayescan	GO:0048856	anatomical structure development	XP_048693336.1
BP	pcadapt	GO:0006325	chromatin organization	XP_048698888.1, XP_048699000.1, XP_048699859.1, XP_048711757.1
BP	pcadapt	GO:0005975	carbohydrate metabolic process	XP_048701071.1, XP_048720721.1, XP_048726480.1
BP	pcadapt	GO:0003016	respiratory system process	XP_048715966.1
MF	RDA_DISP	GO:0045182	translation regulator activity	XP_048705181.1, XP_048712124.1
MF	RDA_DISP	GO:0048018	receptor ligand activity	XP_048684972.1, XP_048685583.1
MF	RDA_SIA	GO:0016787	hydrolase activity	XP_048675843.1, XP_048677515.1, XP_048677743.1, XP_048678416.1, XP_048683235.1, XP_048691494.1, XP_048695193.1, XP_048698505.1, XP_048698728.1, XP_048718019.1
MF	pcadapt	GO:0060089	molecular transducer activity	XP_048687171.1, XP_048698888.1, XP_048702865.1, XP_048715711.1, XP_048715966.1, XP_048717391.1, XP_048721775.1
MF	pcadapt	GO:0016740	transferase activity	XP_048687171.1, XP_048699000.1, XP_048703348.1, XP_048715711.1, XP_048715966.1, XP_048717391.1, XP_048718088.1, XP_048721634.1, XP_048721775.1
